# Supplementary material
Source: PubMed Central journal article supplement (PMC4856479)
Supplement: NIHMS742789-supplement-supp_info.pdf [file NIHMS742789-supplement-supp_info.pdf]

Figure 2e

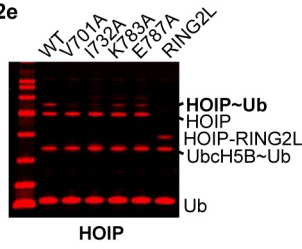

Figure 3d

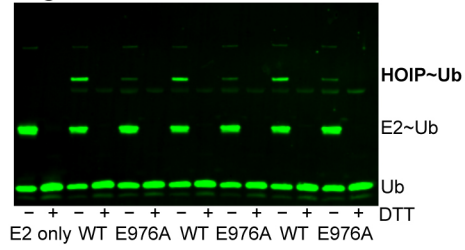

Figure 4b / Extended Data Figure 9d

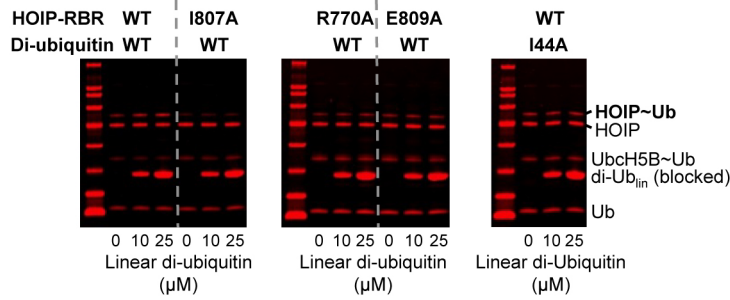

Extended Data Figure 5d

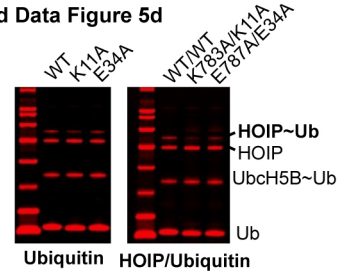

Extended Data Figure 5f

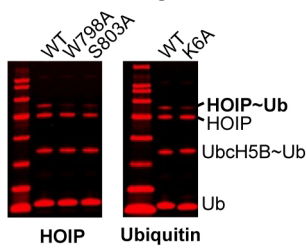

Extended Data Figure 7b

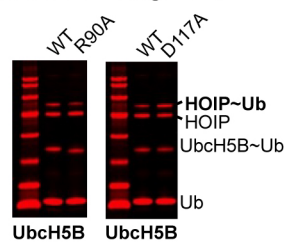

Extended Data Figure 9e

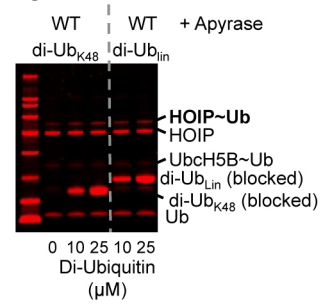

Extended Data Figure 9f

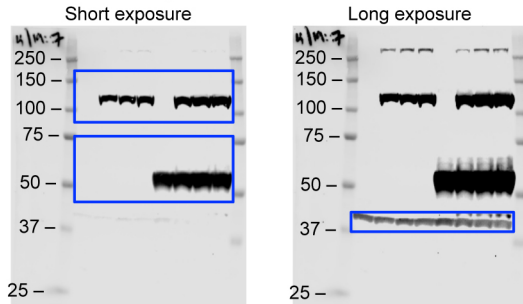

Supplementary Figure 1 | Uncropped blots and representative gels/blots of quantitative HOIP~Ub thioester transfer assays. Representative SDS-PAGE gels for each quantitative HOIP~Ub thioester transfer experiment displayed in the figures and Extended Data figures and uncropped blots of immunoblotting experiments.

RING1

|         |                                                                |       |    |  |
|---------|----------------------------------------------------------------|-------|----|--|
|         | \$                                                             | \$ \$ | \$ |  |
| HOIP    | CAVCGWALPHNRMQALTSCE--C--TICPDCFRQHTIAL-KEKHIT-----DMVCPA---   | 746   |    |  |
| Parkin  | CIITCDVRS---PVLVFQCNSRH--VICLDCFHLYCVTRLNDRQFVHDPQLGYSLPCVA-G- | 292   |    |  |
| HHARI   | CQICYLNYV-NSYFTGLECG--H--KFCMQCWSEYLTIKIMEEGMGQ-----TISCPAHG-  | 235   |    |  |
| HOIL    | CPVCYSVLAPGEAVVRECL--H--TFCRECLQGTIRN----SQEA-----EVSCPFDIN    | 328   |    |  |
| Triad1  | CAVCMQFVR-KENLLSLACQ--H--QFCRSCWEQHCSVLV-KDGVGV-----GVSCMAQD-  | 187   |    |  |
| ANKIB1  | CDICMCSISVFEDPVDMPG--H--DFCRGCWESFLNLKI-QEGEAH-----NIFCPAYD-   | 382   |    |  |
| ARA54   | CSICFCEKLGSECMYFLSCR--H--VYCKACLKDYFEIQI-RDGGVQ-----CLNCPPEPK- | 269   |    |  |
| Parc    | CPVCVSPLGDDDLPSLCCM--H--YCKSCWNEYLTTRI-EQNLVL-----NCTCPIAD-    | 2119  |    |  |
| RNF144A | CKLCLGEYPVEQMTTIAQCQ--C--IFCTLCLKQVVELLI-KEGLET-----AISCDA--   | 69    |    |  |
| RNF144B | CKLCLCEQSLDKMTTLQEQ--C--IFCTACLKQVQLAI-REGCGS-----PITCPDMV-    | 79    |    |  |
| Dorf1n  | CPCLLRHSHKDRFPDITMCH--H--RSCVDCLRQYLRLEI-SESRVN-----ISCP--     | 178   |    |  |
| NKLAM   | CPCLLVRLLPPERAPRLSCP--H--RSCRDCLRHYLRLEI-SESRVP-----ISCP--     | 165   |    |  |
| RNF216  | CRCCYGEFP--FEELTQCADAH--LFCKECLIRYAQEAVFSGKLE-----LSCMEGS--    | 563   |    |  |
| RNF217  | CRVCLEDKPIKP----LPC--CKKAVCEECLKVYLSAQV-QLGQVE-----IKCPITE-    | 308   |    |  |

RING1 →    ← h<sub>E1</sub>    ← h<sub>E2</sub>    ← IBR

|         |                                                                |      |
|---------|----------------------------------------------------------------|------|
|         | * * ## # *                                                     |      |
| HOIP    | ---CGRPDLTDDTQLLSYFSTLDIQLRESLEPDAYAL-FHKKLTGVLMRDPKFLW-CAQ--- | 801  |
| Parkin  | ---CPNSLIKE-----LHH-FR-ILGEEQYNR-YQYGAEECV-LQMGGVL-CPRPG-      | 336  |
| HHARI   | ---CDILVDD--NTV-----MRLITDSKVKLK-YQHLLTNSFVFCNRLKW-CPAPD-      | 280  |
| HOIL    | TYSKSGKLE--REI-----KAL-LTPEDYQR-FLDLGISIAENRSFASYH-CKTPD-      | 375  |
| Triad1  | ---CPLRTP--DFV-----FPLLPNEELREK-YRRYLFDRDYVESHVQLQL-CPGAD-     | 232  |
| ANKIB1  | ---CFQLVPV--DII-----ESVV-SKEMDKR-YLQFDIKAFVENNPAIKW-CPTPG-     | 426  |
| ARA54   | ---CPSVATP--GQV-----K-ELVEAELFAR-YDRLLQSSLDLMADVYV-CPRPC-      | 313  |
| Parc    | ---CPAQPFG--AFI-----RAIVSSPEVISK-YEKALLRGVYVESCNSLNTW-CTNPQG   | 2165 |
| RNF144A | ---CPKQGHQENEI-----E-CMVAAEIMQR-YKLLQFREVLFDPDPCRTW-CPAST-     | 115  |
| RNF144B | ---CLNHGTQAEI-----A-CLVVDQFQL-YQRLKFRREVHLDPRYRW-CPVAD-        | 125  |
| Dorf1n  | ---CTERFNP--HDI-----RLILSDDVLMKEYEYFMLRRNLVADPDCRW-CPAPD-      | 223  |
| NKLAM   | ---CSERLNP--HDI-----RLLLADPPLMHKYEYFMLRRYLASDPDCRW-CPAPD-      | 210  |
| RNF216  | ---CTCSFPT--SEL-----EKVLPQTILYKY-YERKAEVEVAAYADELVRCPSP---     | 607  |
| RNF217  | ---CFEFL--TTV-----VYNLT-HEDSIK-Y-KYFLE-LGRIDSSTKX-CPQ---       | 348  |

IBR →

|         |                                                                |      |
|---------|----------------------------------------------------------------|------|
|         | # #                                                            |      |
| HOIP    | CSFGFIYREQ-----LEATCPQ----CHQTFVCRCKRQWEEQHRGRSCEDF            | 844  |
| Parkin  | CGAGLPPDPQRK-----VTCEGNGLGCGFACRECKEAY--HEGE-CSAV              | 380  |
| HHARI   | CHHVVKVQYDP-----AKPVRC-----KCGRFCCNCGENW--HDPVKCKWL            | 320  |
| HOIL    | CKGWCFFDDVN-----EFTCPV----CFHVNCLLCKA-I--HEQMCKEY              | 414  |
| Triad1  | CPMVIRVQEP-----RARRVQCNR----CNEVFCFKCRQMY--HAPTDCAI            | 273  |
| ANKIB1  | CDRAVRLTKQGSNTSGSDTLSFPLLRAPAVDC--GKGLHF--CWEC--LGEAHEPCDQTW   | 481  |
| ARA54   | CQLPVMQEP-----GCTMGICSS-----CNFAFCTLRLTY--HGVSCKVT             | 353  |
| Parc    | CDRILCRGG-----LGCSTTCSK----CGWASCFNCS--FPEAHYPASCGHM           | 2206 |
| RNF144A | CQAVCQLQDVGLQ-----TPQPVQCKA----CRMEFCSTCKASW--HPGQGCPT         | 159  |
| RNF144B | CQTVCPVASSDPG-----QPVLVECPG-----CHLKFCSCCKDAW--HAEVSCRDS       | 169  |
| Dorf1n  | CGYAVIAFGCASC-----PKLTCGREG--CGTEFCYHCKQIW--HPNQCDAA           | 267  |
| NKLAM   | CGYAVIAYGCASC-----PKLTCGREG--CGTEFCYHCKQIW--HPNQCDMA           | 254  |
| RNF216  | CSFPALLSDV-----KRFSCPDPH--CRKETCRKCOGLWKE-HNGLTCEEL            | 651  |
| RNF217  | CKHFTYFKKKGHIPTP-----SRSESKYKIQCP-----CQFVWCFKCHSPW--HEGVNCKEY | 399  |

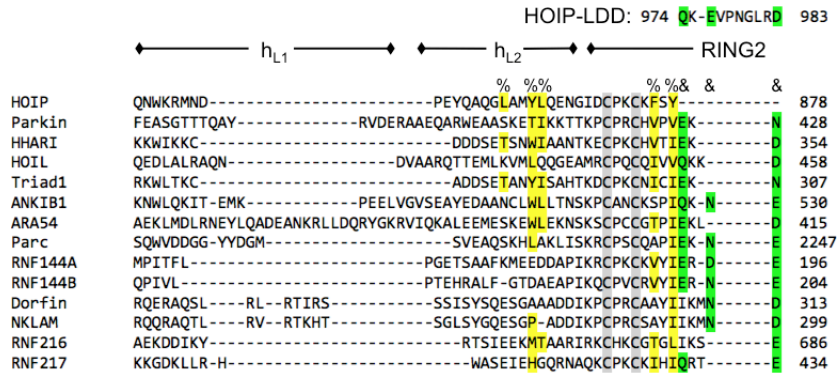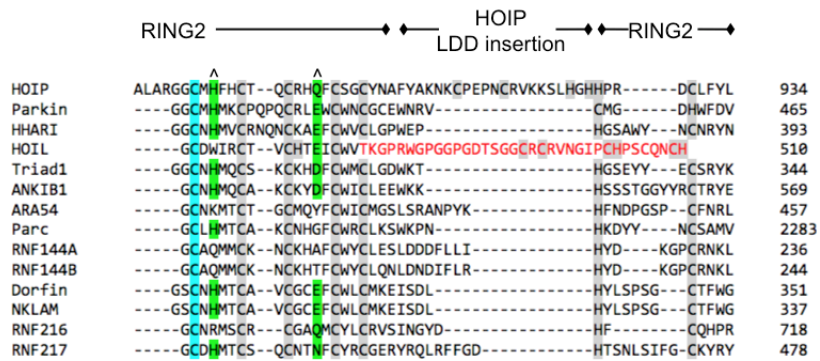

**Supplementary Data 1 | Sequence alignment of all human RBR E3 ligases.** Domains and regions are annotated above the alignment. Functionally important sites are indicated with symbols: E2 binding site: \$, UBR1: \*, UBR2: %, UBR3: #, contact conduit 1: &, and contact conduit 2: ^.

Conserved hydrophobic and charged/polar residues in these sites are highlighted with yellow or green background, respectively. Zinc coordinating Cys and His residues are highlighted with grey background; the active site Cys residues are highlighted with cyan background. HOIP-LDD residues 974-983 containing contact conduit 1 (see also Extended Data Fig. 7) are included as a separate sequence aligned above the functionally corresponding residues of the RING2 of the other RBRs. The C-terminal part of HOIL-RING2 also contains an insertion, which has not been aligned with the other RBRs (red).
